# Supplementary material
Source: Springer Nature journal article supplement (https://www.springermedizin.de/resource/supplementary/12876_2009_453_MOESM2_ESM.pdf/9437042)

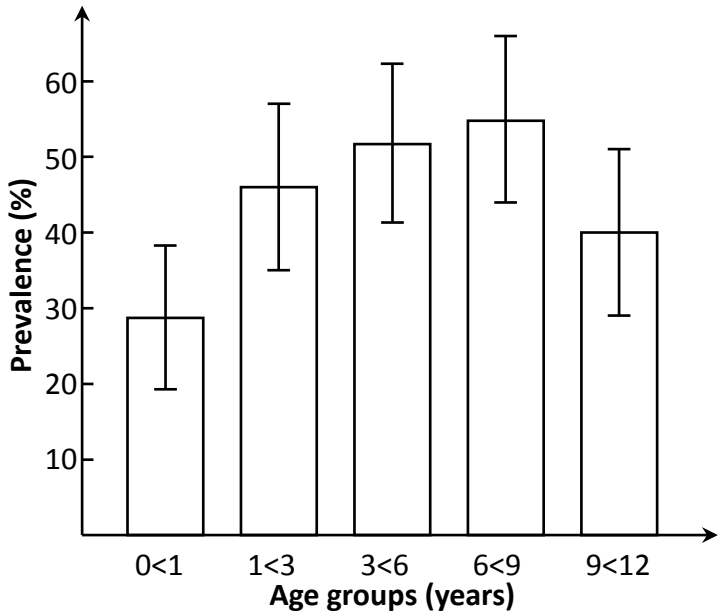

Supplement: MOESM2 [file 9437042]
